# Supplementary material for: Novel Analysis of Oceanic Surface Water Metagenomes Suggests Importance of Polyphosphate Metabolism in Oligotrophic Environments
Source: PLoS One. 2011 Jan 28;6(1):e16499. doi: 10.1371/journal.pone.0016499 (PMC3030594; doi:10.1371/journal.pone.0016499)
Supplement: Table S1 — Calculated mean and median phosphate concentrations for each GOS site from the World Ocean Database. (XLS) [file pone.0016499.s003.xls]

## Sheet: Phosphate
Site	Year of first measurement	Year of last measurement	Number of measurements	Full mean	Full median	Full Skew value*	Last 10 year measurments number	Last 10 year mean	Last 10 year median	Last 10 year skew value
GS000a	1929	2008	8060	0.22	0.14	2.47	510	0.25	0.29	1.97
GS001	1932	1999	317	0.25	0.04	1.73	147	0.38	0.13	0.99
GS002	1932	1999	344	0.45	0.42	0.68	116	0.6	0.62	0.06
GS003	1932	1999	142	0.55	0.5	0.76	8	0.61	0.54	0.43
GS004	1966	1998	517	0.38	0.31	1.43	14	0.45	0.39	1.95
GS005	1966	1998	1021	0.44	0.36	1.12	9	0.48	0.39	1.28
GS006	NO READINGS
GS007	1932	1991	92	0.56	0.5	0.38	31	0.44	0.41	1.17
GS008	1932	1976	330	0.77	0.74	0.69	316	0.78	0.75	0.69
GS009	1931	1976	382	0.76	0.73	0.7	320	0.78	0.75	0.67
GS010	1931	1980	120	0.29	0.2	1.91	113	0.26	0.17	1.84
GS011	1949	1949	1	0.17	0.17	NA	1	0.17	0.17	NA
GS012	1949	1950	112	0.24	0.21	0.75	112	0.24	0.21	0.75
GS013	1931	1984	22	0.43	0.33	1.31	1	0.05	0.05	NA
GS014	1933	1978	225	0.14	0.05	2.48	197	0.11	0.05	3.12
GS015	1951	1984	15	0.05	0.04	0.23	9	0.05	0.05	0.83
GS016	1951	1984	17	0.07	0.08	1.01	4	0.07	0.08	-0.7
GS017	1962	1970	4	0.21	0.15	0.67	4	0.21	0.15	0.67
GS018	1933	1933	1	0.19	0.19	NA	1	0.19	0.19	NA
GS019	1965	1970	5	0.19	0.1	0.96	5	0.19	0.1	0.96
GS021	1955	1970	11	0.23	0.19	1.23	9	0.19	0.18	0.58
GS022	NO READINGS
GS023	1956	1959	38	0.42	0.41	0.93	38	0.42	0.41	0.93
GS026	1971	1971	2	0.18	0.18	NA	2	0.18	0.18	NA
GS027/28	1964	1971	8	0.98	0.93	0.1	8	0.98	0.93	0.1
GS029	1952	1992	20	0.56	0.45	2.12	1	1.24	1.24	NA
GS030	1964	1993	29	0.65	0.7	0.06	4	0.65	0.76	-0.53
GS031	1964	1993	63	0.64	0.62	0.34	16	0.52	0.54	-0.32
GS032	1964	1992	29	0.58	0.53	0.65	1	1.24	1.24	NA
GS034	1966	1971	3	1.01	0.54	0.38	3	1.01	0.54	0.38
GS035	1952	1993	14	0.34	0.28	1.31	3	0.18	0.03	0.38
GS036	1964	1992	27	0.61	0.6	0.56	7	0.63	0.54	1.33
GS037	1960	1975	5	0.81	0.81	0.17	4	0.78	0.7	0.42
GS047	1956	1956	1	0.99	0.99	NA	1	0.99	0.99	NA
GS048/49	1963	2005	14	0.23	0.19	2	2	0.18	0.18	NA
GS051	1978	1979	2	0.39	0.39	NA	2	0.39	0.39	NA
GS108a	NO READINGS
GS109	1962	1962	1	0.16	0.16	NA	1	0.16	0.16	NA
GS110a	1979	1995	12	0.11	0.11	1.1	9	0.1	0.1	-0.1
GS111	NO READINGS
GS112a	1994	1995	5	0.14	0.12	0.44	5	0.14	0.12	0.44
GS113	1965	1965	1	0.2	0.2	NA	1	0.2	0.2	NA
GS114	1970	1990	3	0.3	0.2	0.32	2	0.35	0.35	NA
GS115	1963	1991	7	0.23	0.2	0.5	4	0.23	0.2	0.42
GS116	1962	1979	26	0.32	0.33	0.6	19	0.33	0.36	-0.18
GS117a	1962	1979	57	0.35	0.3	0.88	50	0.34	0.3	1.06
GS119	NO READINGS
GS120	1961	1979	6	0.18	0.16	0.36	2	0.08	0.08	NA
GS121	NO READINGS
GS122a	1964	1964	1	0.16	0.16	NA	1	0.16	0.16	NA
GS123	NO READINGS
GS148	1977	1977	5	0.25	0.21	0.41	5	0.25	0.21	0.41
GS149	NO READINGS
* Skewness is calculated as follows:
